# Supplementary material for: Transcriptome resources and functional characterization of monoterpene synthases for two host species of the mountain pine beetle, lodgepole pine (Pinus contorta) and jack pine (Pinus banksiana)
Source: PubMed Central journal article supplement (PMC3668260; doi:10.1186/1471-2229-13-80), 2013-05-16
Supplement: 1471-2229-13-80-S1.pdf [file 1471-2229-13-80-S1.pdf]

**Table S1.** Development of transcriptome sequence resources for lodgepole pine and jack pine. cDNA was sequenced using three different sequencing platforms i) Sanger sequencing with paired end reads, ii) Roche 454 Titanium sequencing iii) Illumina GA (lodgepole pine; 108 bp paired-end reads) or Illumina HiSeq2000 (jack pine; 100 bp paired-end reads).

| <b>Species</b> | <b>Sequencing platform</b> | <b>Quantity of sequencing</b> | <b># Reads</b> | <b># bp</b>    |
|----------------|----------------------------|-------------------------------|----------------|----------------|
| Lodgepole pine | Sanger                     | 22,000 cDNA clones            | 41,134         | 31,362,218     |
|                | 454 Titanium               | 2 x half plate                | 1,280,650      | 522,187,905    |
|                | Illumina GA                | 1 lane                        | 58,480,990     | 6,315,946,920  |
| Jack pine      | Sanger                     | 20,000 cDNA clones            | 36,334         | 27,748,542     |
|                | 454 Titanium               | 2 x half plate                | 1,397,993      | 536,550,760    |
|                | Illumina HiSeq2000         | 1 lane                        | 202,383,402    | 20,238,340,200 |
