# Supplementary material for: Transcriptome resources and functional characterization of monoterpene synthases for two host species of the mountain pine beetle, lodgepole pine (Pinus contorta) and jack pine (Pinus banksiana)
Source: PubMed Central journal article supplement (PMC3668260; doi:10.1186/1471-2229-13-80), 2013-05-16
Supplement: 1471-2229-13-80-S2.pdf [file 1471-2229-13-80-S2.pdf]

**Table S2.** Assembly of transcriptome sequences for lodgepole pine and jack pine. Sequences were assembled individually by platform, or as hybrid assemblies, and assessed for the number of contigs, singletons and putatively unique genes.

|                | Sequence source                  | Assembler | # Contigs <sup>1,2</sup> | # Singletons <sup>1,2</sup> | # Putatively Unique Genes <sup>1,2</sup> |
|----------------|----------------------------------|-----------|--------------------------|-----------------------------|------------------------------------------|
| Lodgepole pine | Sanger                           | CAP3      | 9,804                    | 4,039                       | 13,843                                   |
|                | 454 Titanium <sup>1</sup>        | Newbler   | 36,923                   | 73,343                      | 30,262                                   |
|                | Illumina GA <sup>2</sup>         | Trinity   | 41,567                   | N/A                         | 30,748                                   |
|                | Sanger + 454 Hybrid <sup>1</sup> | Newbler   | 33,589                   | 116,424                     | 21,362                                   |
| Jack pine      | Sanger                           | CAP3      | 9,950                    | 3,762                       | 13,712                                   |
|                | 454 Titanium <sup>1</sup>        | Newbler   | 33,974                   | 68,790                      | 27,639                                   |
|                | Illumina HiSeq2000 <sup>2</sup>  | Trinity   | 55,416                   | N/A                         | 34,180                                   |
|                | Sanger + 454 Hybrid <sup>1</sup> | Newbler   | 31,327                   | 114,303                     | 20,169                                   |

<sup>1</sup> Contig counts in the context of the 454 assembly represent the number of isotigs greater than or equal to 500 bp. Singleton counts are calculated by reads labelled as 'Singleton' in the file 454ReadStatus.txt. Tentatively unique gene count is calculated by the number of unique isogroups containing isotigs greater than or equal to 500 bp.

<sup>2</sup> Contig counts in the context of the Illumina assembly represent the number of contigs greater than or equal to 500 bp. The Trinity assembler does not keep track of which sequences are being used in the assembly, thus the number of singletons is not available (N/A). Tentatively unique gene count is calculated by the unique component count in the result file Trinity.fasta.
