# Supplementary material for: Transcriptome resources and functional characterization of monoterpene synthases for two host species of the mountain pine beetle, lodgepole pine (Pinus contorta) and jack pine (Pinus banksiana)
Source: PubMed Central journal article supplement (PMC3668260; doi:10.1186/1471-2229-13-80), 2013-05-16
Supplement: 1471-2229-13-80-S3.pdf [file 1471-2229-13-80-S3.pdf]

**Table S3.** Assessment of different sequencing platforms and assembly qualities using Core Eukaryotic Genes Mapping Approaches (CEGMA). Individual and hybrid assemblies were assessed for the presence and full-length cDNA coverage of 458 core eukaryotic proteins using the minimum criteria of at least 90% coverage with a TBLASTN e-value cut-off of  $1 \times 10^{-20}$ .

| Species        | Assembly               | # of CEGMA proteins |                        |
|----------------|------------------------|---------------------|------------------------|
|                |                        | in assembly         | putatively full length |
| Lodgepole pine | Sanger (CAP3)          | 377                 | 216                    |
|                | 454 (Newbler)          | 447                 | 330                    |
|                | Illumina (Trinity)     | 452                 | 358                    |
|                | Sanger + 454 (Newbler) | 444                 | 325                    |
| Jack pine      | Sanger (CAP3)          | 374                 | 211                    |
|                | 454 (Newbler)          | 446                 | 331                    |
|                | Illumina (Trinity)     | 450                 | 362                    |
|                | Sanger + 454 (Newbler) | 445                 | 322                    |
