# Supplementary material for: Transcriptome resources and functional characterization of monoterpene synthases for two host species of the mountain pine beetle, lodgepole pine (Pinus contorta) and jack pine (Pinus banksiana)
Source: PubMed Central journal article supplement (PMC3668260; doi:10.1186/1471-2229-13-80), 2013-05-16
Supplement: 1471-2229-13-80-S5.pdf [file 1471-2229-13-80-S5.pdf]

Table S5. Functional characterization of monoterpene synthases from A) lodgepole pine and B) jack pine. Products representing more than 5% of the total amount of monoterpenes produced by the enzyme are listed as percent of total product +/- SE.

A) Lodgepole pine

|                                     | % of total products |                       |                       |                    |                      |                    |                    |                             |                    |                            |                    |                    |                          |
|-------------------------------------|---------------------|-----------------------|-----------------------|--------------------|----------------------|--------------------|--------------------|-----------------------------|--------------------|----------------------------|--------------------|--------------------|--------------------------|
|                                     | tricyclene          | (+)- $\alpha$ -pinene | (-)- $\alpha$ -pinene | (-)-camphene       | (-)- $\beta$ -pinene | (-)-sabinene       | (+)-3-carene       | (-)- $\alpha$ -phellandrene | myrcene            | (-)- $\beta$ -phellandrene | 1,8-cineole        | terpinolene        | (-)- $\alpha$ -terpineol |
| PcTPS-(+) $\alpha$ pin1             |                     | 88.2 $\pm$<br>0.48    |                       |                    |                      |                    |                    |                             |                    |                            |                    |                    |                          |
| PcTPS-(-) $\alpha$ pin1             |                     |                       | 76.6 $\pm$<br>2.2     |                    | 9.88 $\pm$<br>1.8    |                    |                    |                             |                    |                            |                    |                    |                          |
| PcTPS-(-) $\beta$ pin1              |                     |                       | 9.03 $\pm$<br>0.05    |                    | 79.0 $\pm$<br>0.16   |                    |                    |                             |                    |                            |                    |                    |                          |
| PcTPS-(+) 3car1                     |                     |                       |                       |                    |                      |                    | 67.6 $\pm$<br>0.89 |                             |                    |                            |                    | 12.5 $\pm$<br>0.14 | 5.73 $\pm$<br>0.42       |
| PcTPS-(-) $\beta$ phell1            |                     |                       |                       |                    |                      |                    | 5.14 $\pm$<br>0.08 |                             |                    | 87.5 $\pm$<br>0.27         |                    |                    |                          |
| PcTPS-(-) $\beta$ phell2            |                     |                       |                       |                    |                      |                    |                    |                             |                    | 81.8 $\pm$<br>0.30         |                    |                    |                          |
| PcTPS-(-)camp/<br>(+) $\alpha$ pin1 | 6.78 $\pm$<br>0.04  | 26.2 $\pm$<br>0.13    | 17.9 $\pm$<br>0.09    | 29.1 $\pm$<br>0.13 | 7.89 $\pm$<br>0.04   |                    |                    |                             | 5.01 $\pm$<br>0.04 |                            |                    |                    |                          |
| PcTPS-<br>$\alpha$ terp/1,8cin      |                     |                       |                       |                    |                      | 8.58 $\pm$<br>0.20 |                    |                             | 8.06 $\pm$<br>0.15 |                            | 32.4 $\pm$<br>0.34 |                    | 36.8 $\pm$<br>0.20       |

B) Jack pine

|                                   | % of total products               |                                   |                                   |                                   |                 |                                   |                 |                                   |                                   |                                   |                                   |
|-----------------------------------|-----------------------------------|-----------------------------------|-----------------------------------|-----------------------------------|-----------------|-----------------------------------|-----------------|-----------------------------------|-----------------------------------|-----------------------------------|-----------------------------------|
|                                   | (+)- $\alpha$ -pinene             | (-)- $\alpha$ -pinene             | (-)- $\beta$ -pinene              | (+)-3-carene                      | (-)-limonene    | (-)- $\beta$ -phellandrene        | terpinolene     | terpin-4-ol                       | (+)- $\alpha$ -terpineol          | (-)- $\alpha$ -terpineol          | geraniol                          |
| PbTPS-(+) $\alpha$ pin1           | <b>91.7 <math>\pm</math> 0.48</b> |                                   |                                   |                                   |                 |                                   |                 |                                   |                                   |                                   |                                   |
| PbTPS-(-) $\alpha$ pin1           |                                   | <b>77.9 <math>\pm</math> 0.17</b> | 9.62 $\pm$ 0.15                   |                                   |                 |                                   |                 |                                   |                                   |                                   |                                   |
| PbTPS-(-) $\beta$ pin1            |                                   | 8.42 $\pm$ 0.16                   | <b>80.6 <math>\pm</math> 0.22</b> |                                   |                 |                                   |                 |                                   |                                   |                                   |                                   |
| PbTPS-(-) $\beta$ pin2            |                                   | 13.1 $\pm$ 0.13                   | <b>75.2 <math>\pm</math> 0.18</b> |                                   |                 |                                   |                 |                                   |                                   |                                   |                                   |
| PbTPS-(+) $\beta$ car1            |                                   |                                   |                                   | 55.6 $\pm$ 3.5                    |                 |                                   | 20.8 $\pm$ 1.4  |                                   | 5.30 $\pm$ 2.0                    | 7.26 $\pm$ 2.8                    |                                   |
| PbTPS-(+) $\beta$ car2            |                                   |                                   |                                   | <b>69.6 <math>\pm</math> 0.31</b> |                 |                                   | 6.81 $\pm$ 0.23 |                                   |                                   | 6.86 $\pm$ 0.13                   |                                   |
| PbTPS-(-) $\beta$ phell1          |                                   |                                   |                                   |                                   |                 | <b>85.9 <math>\pm</math> 0.14</b> |                 |                                   |                                   |                                   |                                   |
| PbTPS-(-) $\alpha$ / $\beta$ pin1 |                                   | <b>39.4 <math>\pm</math> 0.99</b> | <b>33.5 <math>\pm</math> 0.65</b> |                                   |                 |                                   |                 |                                   |                                   |                                   |                                   |
| PbTPS- $\alpha$ terp              |                                   |                                   |                                   |                                   | 5.26 $\pm$ 0.13 |                                   | 9.2 $\pm$ 0.20  | <b>17.3 <math>\pm</math> 0.35</b> | <b>14.5 <math>\pm</math> 0.64</b> | <b>18.1 <math>\pm</math> 0.80</b> | <b>9.96 <math>\pm</math> 0.74</b> |
