# Supplementary material for: Transcriptome resources and functional characterization of monoterpene synthases for two host species of the mountain pine beetle, lodgepole pine (Pinus contorta) and jack pine (Pinus banksiana)
Source: PubMed Central journal article supplement (PMC3668260; doi:10.1186/1471-2229-13-80), 2013-05-16
Supplement: 1471-2229-13-80-S6.pdf [file 1471-2229-13-80-S6.pdf]

**Table S6. NCBI Accession numbers of the amino acid sequences used for phylogenetic analysis of functionally characterized conifer monoterpene synthases**

| Species                                                      | Abbreviation                      | Function                                     | Accession # | Reference              |
|--------------------------------------------------------------|-----------------------------------|----------------------------------------------|-------------|------------------------|
| <i>Abies grandis</i> (Ag)                                    | AgTPS-myr                         | myrcene synthase                             | AAB71084    | Bohlmann et al., 1997  |
|                                                              | AgTPS-(-)-lim                     | (-)-limonene synthase                        | AAB70907    | Bohlmann et al., 1997  |
|                                                              | AgTPS-(-) $\alpha$ / $\beta$ pin  | (-)- $\alpha$ / $\beta$ -pinene synthase     | AAB71085    | Bohlmann et al., 1997  |
|                                                              | AgTPS-(-)camp                     | (-)-camphene synthase                        | AAB70707    | Bohlmann et al., 1997  |
|                                                              | AgTPS-(-) $\beta$ phell           | (-)- $\beta$ -phellandrene synthase          | AAF61453    | Bohlmann et al., 1999  |
|                                                              | AgTPS-terpinolene                 | terpinolene synthase                         | AAF61454    | Bohlmann et al., 1999  |
|                                                              | AgTPS-(-) $\alpha$ pin/(-)lim     | (-)- $\alpha$ -pinene/(-)-limonene synthase  | AAF61455    | Bohlmann et al., 1999  |
| <i>Picea abies</i> (Pa)                                      | PaTPS-(+)3car                     | (+)-3-carene synthase                        | AAO73863    | Fäldt et al., 2003     |
|                                                              | PaTPS-(-) $\alpha$ / $\beta$ pin  | (-)- $\alpha$ / $\beta$ -pinene synthase     | AAS47692    | Martin et al., 2004    |
|                                                              | PaTPS-(-)lin                      | (-)-linalool synthase                        | AAS47693    | Martin et al., 2004    |
|                                                              | PaTPS-(-)lim                      | (-)-limonene synthase                        | AAS47694    | Martin et al., 2004    |
|                                                              | PaTPS-myr                         | myrcene synthase                             | AAS47696    | Martin et al., 2004    |
| <i>Picea glauca</i> (Pg)                                     | PgTPS-(+)3car                     | (+)-3-carene synthase                        | ACM04452    | Hamberger et al., 2009 |
|                                                              | PgTPS-1,8cin                      | 1,8-cineole synthase                         | ADZ45498    | Keeling et al., 2011   |
|                                                              | PgTPS-(-)lin                      | (-)-linalool synthase                        | ADZ45500    | Keeling et al., 2011   |
|                                                              | PgTPS-(-) $\alpha$ / $\beta$ pin1 | (-)- $\alpha$ / $\beta$ -pinene synthase1    | ADZ45507    | Keeling et al., 2011   |
|                                                              | PgTPS-(-) $\alpha$ / $\beta$ pin2 | (-)- $\alpha$ / $\beta$ -pinene synthase2    | ADZ45508    | Keeling et al., 2011   |
| <i>Picea engelmannii</i><br><i>x Picea glauca</i><br>(PexPg) | Pe x PgTPS-1,8cin                 | 1,8-cineole synthase                         | ADZ45497    | Keeling et al., 2011   |
|                                                              | Pe x PgTPS-(+)3car                | (+)-3-carene synthase                        | ADZ45510    | Keeling et al., 2011   |
| <i>Pinus contorta</i> (Pc)                                   | PcTPS-(+) $\alpha$ pin1           | (-)- $\alpha$ -pinene synthase1              | JQ240295    | This study             |
|                                                              | PcTPS-(-) $\alpha$ pin1           | (-)- $\alpha$ -pinene synthase1              | JQ240303    | This study             |
|                                                              | PcTPS-(-) $\beta$ pin1            | (-)- $\beta$ -pinene synthase1               | JQ240293    | This study             |
|                                                              | PcTPS-(+)3car1                    | (+)-3-carene synthase1                       | JQ240307    | This study             |
|                                                              | PcTPS-(-)camp/(+) $\alpha$ pin1   | (-)-camphene/(+)- $\alpha$ -pinene synthase1 | JQ240299    | This study             |

|                                 |                                |                                      |                                |                         |
|---------------------------------|--------------------------------|--------------------------------------|--------------------------------|-------------------------|
|                                 | PcTPS-(-)βphell1               | (-)-β-phellandrene synthase1         | JQ240301                       | This study              |
|                                 | PcTPS-(-)βphell2               | (-)-β-phellandrene synthase2         | JQ240300                       | This study              |
|                                 | PcTPS-aterp/1,8cin             | (+)-α-terpineol/1,8 cineole synthase | JQ240309                       | This study              |
|                                 | PcTPS-monoTPS1                 | monoterpene synthase like1           | JQ240294                       | This study              |
| <i>Pinus banksiana</i><br>(Pb)  | PbTPS-(-)α/βpin1               | (-)-α/β-pinene synthase1             | JQ240290                       | This study              |
|                                 | PbTPS-(+)αpin1                 | (+)-α-pinene synthase1               | JQ240298                       | This study              |
|                                 | PbTPS-(-)αpin1                 | (-)-α-pinene synthase1               | JQ240304                       | This study              |
|                                 | PbTPS-(-)βpin1                 | (-)-β-pinene synthase1               | JQ240291                       | This study              |
|                                 | PbTPS-(-)βpin2                 | (-)-β-pinene synthase2               | JQ240292                       | This study              |
|                                 | PbTPS-(+)3car1                 | (+)-3-carene synthase1               | JQ240305                       | This study              |
|                                 | PbTPS-(+)3car2                 | (+)-3-carene synthase2               | JQ240306                       | This study              |
|                                 | PbTPS-(-)βphell1               | (-)-β-phellandrene synthase1         | JQ240302                       | This study              |
|                                 | PbTPS-aterp                    | (+)-α-terpineol synthase             | JQ240308                       | This study              |
|                                 | PbTPS-mono1                    | monoterpene synthase like1           | JQ240296                       | This study              |
|                                 | PbTPS-mono2                    | monoterpene synthase like1           | JQ240297                       | This study              |
|                                 | <i>Pinus sabiana</i><br>(Psab) | PsabTPS-MBO1                         | 2-methyl-3-buten-2-ol synthase | AEB53064                |
| <i>Pinus taeda</i> (Pt)         | PtTPS-(-)αpin                  | (-)-α-pinene synthase                | AAO61225                       | Phillips et al., 2003   |
|                                 | PtTPS-(-)αterp                 | α-terpineol synthase                 | AAO61227                       | Phillips et al., 2003   |
|                                 | PtTPS-(+)αpin                  | (+)-α-pinene synthase                | AAO61228                       | Phillips et al., 2003   |
| <i>Picea sitchensis</i><br>(Ps) | PsTPS-(-)lim                   | (-)-limonene synthase                | ABA86248                       | Byun-McKay et al., 2006 |
|                                 | PsTPS-(-)αpin                  | (-)-α-pinene synthase                | AAP72020                       | Byun-McKay et al., 2006 |
|                                 | PsTPS-1,8cin                   | 1,8-cineole synthase                 | ADZ45499                       | Keeling et al., 2011    |
|                                 | PsTPS-(-)lin1                  | (-)-linalool synthase1               | ADZ45501                       | Keeling et al., 2011    |
|                                 | PsTPS-(-)lin2                  | (-)-linalool synthase2               | ADZ45502                       | Keeling et al., 2011    |
|                                 | PsTPS-(-)βphell1               | (-)-β-phellandrene synthase1         | ADZ45503                       | Keeling et al., 2011    |
|                                 | PsTPS-(-)βphell2               | (-)-β-phellandrene synthase2         | ADZ45504                       | Keeling et al., 2011    |

|                                                  |                       |                                    |          |                      |
|--------------------------------------------------|-----------------------|------------------------------------|----------|----------------------|
|                                                  | PstPS-(-)βphell3      | (-)-β-phellandrene synthase3       | ADZ45505 | Keeling et al., 2011 |
|                                                  | PstPS-(-)βphell4      | (-)-β-phellandrene synthase4       | ADZ45506 | Keeling et al., 2011 |
|                                                  | PstPS-(-)α/βpin       | (-)-α/β-pinene synthase            | ADZ45509 | Keeling et al., 2011 |
|                                                  | PstPS-(+)3car         | (+)-3-carene synthase              | ADZ45511 | Keeling et al., 2011 |
|                                                  | PstPS-(+)3car1R       | (+)-3-carene synthase1(R)          | HQ336798 | Hall et al., 2010    |
|                                                  | PstPS-(+)3car1S       | (+)-3-carene synthase1(S)          | HQ336799 | Hall et al., 2010    |
|                                                  | PstPS-(+)3car2R       | (+)-3-carene synthase2(R)          | HQ336800 | Hall et al., 2010    |
|                                                  | PstPS-(+)3car3R       | (+)-3-carene synthase3(R)          | HQ336801 | Hall et al., 2010    |
|                                                  | PstPS-(+)3car3S       | (+)-3-carene synthase3(S)          | HQ336802 | Hall et al., 2010    |
|                                                  | PstPS-(+)sabR         | (+)-sabinene synthase(R)           | HQ336803 | Hall et al., 2010    |
|                                                  | PstPS-(+)sabS         | (+)-sabinene synthase(S)           | HQ336804 | Hall et al., 2010    |
| <i>Pseudotsuga menziesii</i> (Pm)                | PmTPS-terpinolene     | terpinolene synthase               | AAX07264 | Huber et al., 2005   |
|                                                  | PmTPS-(-)αpin/(-)camp | (-)-α-pinene/(-)-camphene synthase | AAX07267 | Huber et al., 2005   |
| <b>Outgroup:</b><br><i>Physcomitrella patens</i> | PpTPS-entKS           | ent-kaurene synthase               | BAF61135 | Hayashi et al., 2006 |

---
